# Supplementary material for: Anti-idiotype isolation of a broad and potent influenza A virus-neutralizing human antibody
Source: PubMed Central journal article supplement (PMC11169713; doi:10.3389/fimmu.2024.1399960), 2024-05-30
Supplement: DataSheet_1.pdf [file DataSheet_1.pdf]

**Supplementary Table 1. Protein sequence of anti-idiotypic antibody variable domains.****>7G1F9\_HeavyChain**

MEWSRVFIFLLSVTAGVHSQVQLQQSGAELVRPGTSVKVSKASGYAFTDYILIEWIKQRPQGGLWIGVNNPGSGETYYNEKFKDKAALTADKSSSTAFMQLSSLT  
SEDSAVYFCARRFYDYADWYFDVWGTGTTVTVSS

**>7G1F9\_LightChain**

MKLPVRLLVLMFWIPASSSDVMTQTPLSLPVSPGDQASISCRSSQSLVHGNGNTYLHWYLOKPGQSPKLLIYKISDRLSGVPDRFSGSGSGTDFTLNINKVEAED  
LGVYFCSQSTHVPFTFGSGTKLEIK

**>14H1F6\_HeavyChain**

MNFGLRMIFLVLTTLKGVQCDVNLVESGGDLVMPGGSLILSCAASGFTFSSYTMSWVRQTPEKRLEWVATISSTGDYTYYPDIVKGRFTISRDNANTLYLQMSLK  
SEDTAMYCTRYYGSSYWFYFDVWGTGTTVTVSS

**>14H1F6\_LightChain**

MDFQVQIFSFLLISASVIVSRGQIVLSQSPAILSASPGEKVTMTCRATSSVSIMYQKPGKLPKPIYATSKLASGVPDFHSGSGSGTSYSLTISRVEAEDAAT  
YYCQQRSSNPLTFGSGTKLEIK

**>20C6E10\_HeavyChain**

MEWSRVFIFLLSVTAGVHSQVQLQQSGAELVRPGTSVKVSKASGYAFIDYILIEWIKQRPQGGLWIGVINPGSGETNYNEKFKGKATLTADKSSSTAYMQLSSLT  
SEDSAVYFCVRRFYDYADWYFDVWGTGTTVTVSS

**>20C6E10\_LightChain**

MKLPVRLLVLMFWIPASSSDVMTQIPLSLPVSLGDQASISCRSSQSLVHNGDAYLHWYLOKPGQSPKLLIYKLSNRFSGVDPDRFSGSGSGTDFTLTISRVEAED  
LGVYFCSQSTHVPFTFGSGTKLEIK

**>24B3D4\_HeavyChain**

MNFVLSLIFLALILKGVQCEVQLVESGGGLVKPGGSLKLSCTASGFTFSSFAMSWVRQTPEKRLEWVATISSVSTYTYLDSVKGRYTIISRDNANTLYLQMNLSL  
SSDTAIYYCTRHDYVLFYVMDYWGQGTSTVTVSS

**>24B3D4\_LightChain**

MEKDTLLWVLLWVPGSTGDIVLTQSPASLAVSLGQRATISCRASESVDNSGFSFMNWFQKPGQPPKLLIYAASNQGSVGPDRFSGSGSGTDFSLNIHPMEEDD  
TAMYFCQIQKEVPPTFGGGTNLEIK

**>24D1C2\_HeavyChain**

MEWCWVFLFLLSVTAGVHSKVQLQQSGAELVKPGASVKLSCKASGYTFTDYIIHWVKQKSGQGLWIGWYFPGSGSIKFNKFKDKATLTADKSSSTVYLELSRLT  
SEDSAVYFCARHEPGLWMDYFDYWGQGTTLTVSS

**>24D1C2\_LightChain**

MQIISLLLSVTVIVSNGEIVLTQSPPTMASSPGDKITITCTASSISSNYLHWYQKPGFSPKLLIFRTSNLASGVPDRFSGSGSGTSYSLTIGTLEAEDVATYF  
CQEGSSIPVTFGAGTKLEIK

**>28H6E11\_HeavyChain**

MGWSCIIFFLVATATGVHSQVQLQQSGPEVVRPGVSVKISCKGSGYFTFDHAMHWKQSHAKSLEWIGVFNTYNGDTNYNQKFKEDKATMTIDKSSSTAYLELARLT  
SEDSAIYYCVRLGLLGFYALDYWGQGTSTVTVSS

**>28H6E11\_LightChain**

MKLPVRLLVLMFWIPASSSDVMTQTPLSLPVSLGDQASISCRSSQSIHVHNGNTYLEWYLOKPGQSPKLLIYKVSNRFSGVDPDRFSGSGSGTDFTLNINKVEAED  
LGVYFCFQGSHPVPLTFGAGTKLEIK

**>30F3D2\_HeavyChain**

MEWSRVFIFLLSVTAGVHSQVQLQQSGAELVRPGTSVKVSKASGYAFTDYILIEWIKQRPQGGLWIGVNNPGSGETYYNEKFKDKAALTADKSSSTAFMQLSSLT  
SEDSAVYFCARRFYDYADWYFDVWGTGTTVTVSS

**>30F3D2\_LightChain**

MKLPVRLLVLMFWIPASSSDVMTQTPLSLPVSPGDQASISCRSSQSLVHGNGNTYLHWYLOKPGQSPKLLIYKISDRLSGVPDRFSGSGSGTDFTLNINKVEAED  
LGVYFCSQSTHVPFTFGSGTKLEIK

**Supplementary Table 2. Protein sequence of L5A7 clones variable domains.****>L5A7.1\_HeavyChain**

QVQLQQSGPGLVKPSQTLSTLCVIGDSVSSNSAAWDWIRQSPSRGLEWLGRTYYRSKWYSDYAVSVKSRITITPDTSKNQFSLHLNSVTPEDTAVYYCARAGVRI  
FGVIVDSLQDYWGQGTLLVTVSS

**>L5A7.2\_HeavyChain**

QVQLQQSGPGLVKPSQTLSTLCVIGDSVSSNSAAWDWIRQTPSRGLEWLGRTYYRSKWYSDYAVSVKSRITITPDTSKNQFSLRLNSVTPEDTAVYYCARAGVRV  
FGVIVDSLQDYWGQGTLLVTVSS

**>L5A7.3\_HeavyChain**

QVQLQQSGPGLVKPSQTLSTLCVIGDSVSSNTAAWDWIRQSPSRGLEWLGRTYYRSRWYSDYADSVKSRITITPDTSKNQFSLHLNSVTPEDTAVYYCARAGIRI  
FGIIVDSLQDYWGQGTLLVTVSS

**>L5A7.4\_HeavyChain**

QVQLQQSGPRLVKPSQTLSTLCAISGDSVSSNTAAWDWIRQSSSRGLEWLGRTYYRSRWYHDYEEVSKSRITINADTSKNQFSLQLASVTPEDTAVYYCARAGIRV  
FGIIVDSLQDYWGQGSLLVTVSS

**>L5A7.5\_HeavyChain**

QVQLQQSGPGLVKPSQTLSTLCGISGDSVSSDAAWDWIRQSPSRGLEWLGRTFYRSRWYHDYEEVSKNRITINADTSKNQFSLQLTSVTPEDTAVYYCARAGVRV  
FGIIVNSLDYWGQGTLLVTVSS

**>L5A7.1\_LightChain**

AIQLTQSPSSLSASVGDRTVITCRASQALNSYLAWYQQKPGKAPKLLIFAASTLQSGVPSRFSGSGSDFTFLTISSLQPEDFATYYCQLSKTFGPGTRVDIE

**>L5A7.2\_LightChain**

AIQLTQSPSSLSASVGDRTVITCRASQGFSSYLAWYQQKPGKAPQLLIYAASTLQSGVPSRFSGSGSDFTFLTISSLQPEDFATYYCQQSKTFGPGTRVDIE

**>L5A7.3\_LightChain**

AIQLTQSPSSLSASVGDRTVITCRASQGANSYLAWYQQKPGKAPKLLIYAASTLQSGVPSRFSGSGSDFTSLTISSLQPEDFATYYCQESKTFGPGTRVDIE

**>L5A7.4\_LightChain**

AIQLTQSPSSLSASVGDRTVITCRASQGFNSYLAWYQQKPGKAPPELLIYAASTLQSGVPSRFSGSGSDFTFLTISSLQPEDFATYYCQQSKTFGPGTKVDIK

**>L5A7.5\_LightChain**

AIQLTQSPSSLSASVGDRTVITCRASQATSSYLAWYQQKPGKAPKLLIYAASTLQSGVPSRFSGSGSDFTFLTITSLQPEDFATYYCQLSKTFGPGTKVEIK

**Supplementary Table 3. Data collection statistics related to Supplementary Figure 1.**

| <b>L5A7 Fab</b>                         |                          |
|-----------------------------------------|--------------------------|
| <b>PDB ID</b>                           | 8VVB                     |
| <b>Data collection</b>                  |                          |
| Space group                             | $P2_12_12_1$             |
| Cell constants                          |                          |
| <i>a</i> , <i>b</i> , <i>c</i> (Å)      | 65.760, 109.190, 140.570 |
| <i>a</i> , <i>b</i> , <i>g</i> (°)      | 90, 90, 90               |
| Resolution (Å)                          | 50 – 1.73 (1.78 – 1.73)  |
| $R_{\text{merge}}$ (%)                  | 8.6 (85.3)               |
| <i>I</i> / <i>σI</i>                    | 18.7 (0.8)               |
| $CC_{1/2}$                              | 0.999 (0.836)            |
| Completeness (%)                        | 94.2 (98.1)              |
| Redundancy                              | 11.9 (11.1)              |
| <b>Refinement</b>                       |                          |
| Resolution (Å)                          | 48 – 1.78                |
| No. reflections                         | 94,910 (6,197)           |
| $R_{\text{work}} / R_{\text{free}}$ (%) | 17.38 / 20.92            |
| No. atoms                               |                          |
| Protein                                 | 7722                     |
| Ligand/ion                              | 0                        |
| Water                                   | 1193                     |
| <b>B-factors</b>                        |                          |
| Protein                                 | 23.09                    |
| Ligand/ion                              | N/A                      |
| Water                                   | 34.57                    |
| R.m.s. deviations                       |                          |
| Bond lengths (Å)                        | 0.005                    |
| Bond angles (°)                         | 0.845                    |

\*Values in parentheses are for the highest-resolution shell

Supplementary Table 4. Cryo-EM structure statistics related to Figures 5 and 6.

|                                        | L5A7 Fab bound to<br>INDO05 HA<br>(EMD-43529)<br>(PDB 8VUE) | L5A7 Fab bound to<br>28H6E11 Fab<br>(EMD-43545)<br>(PDB 8VUZ) |
|----------------------------------------|-------------------------------------------------------------|---------------------------------------------------------------|
| <b>Data collection and processing</b>  |                                                             |                                                               |
| Magnification                          | 105,000                                                     | 105,000                                                       |
| Voltage (kV)                           | 300                                                         | 300                                                           |
| Electron exposure (e-/Å <sup>2</sup> ) | 64                                                          | 40                                                            |
| Defocus range (µm)                     | -0.7 to -2.0                                                | -0.7 to -2.0                                                  |
| Pixel size (Å)                         | 1.083                                                       | 0.83                                                          |
| Symmetry imposed                       | C3                                                          | C1                                                            |
| Initial particle images (no.)          | 201,079                                                     | 4,203,652                                                     |
| Final particle images (no.)            | 20,728                                                      | 215,254                                                       |
| Map resolution (Å)                     | 3.59                                                        | 3.88                                                          |
| FSC threshold                          | 0.143                                                       | 0.143                                                         |
| <b>Refinement</b>                      |                                                             |                                                               |
| Model resolution (Å)                   | 3.6                                                         | 3.95                                                          |
| FSC threshold                          | 0.143                                                       | 0.143                                                         |
| Model composition                      |                                                             |                                                               |
| Protein residues                       | 2724                                                        | 870                                                           |
| Ligands                                | 3                                                           | 0                                                             |
| B factors (Å <sup>2</sup> )            |                                                             |                                                               |
| Protein                                | 69.0                                                        | 52.1                                                          |
| Ligand                                 | 65.43                                                       | N/A                                                           |
| R.m.s. deviations                      |                                                             |                                                               |
| Bond lengths (Å)                       | 0.004                                                       | 0.004                                                         |
| Bond angles (°)                        | 0.616                                                       | 0.712                                                         |
| Validation                             |                                                             |                                                               |
| MolProbity score                       | 1.86                                                        | 2.12                                                          |
| Clashscore                             | 10.27                                                       | 14.49                                                         |
| Poor rotamers (%)                      | 0.42                                                        | 0.53                                                          |
| Ramachandran plot                      |                                                             |                                                               |
| Favored (%)                            | 95.30                                                       | 92.81                                                         |
| Allowed (%)                            | 4.70                                                        | 6.96                                                          |
| Disallowed (%)                         | 0.0                                                         | 0.23                                                          |

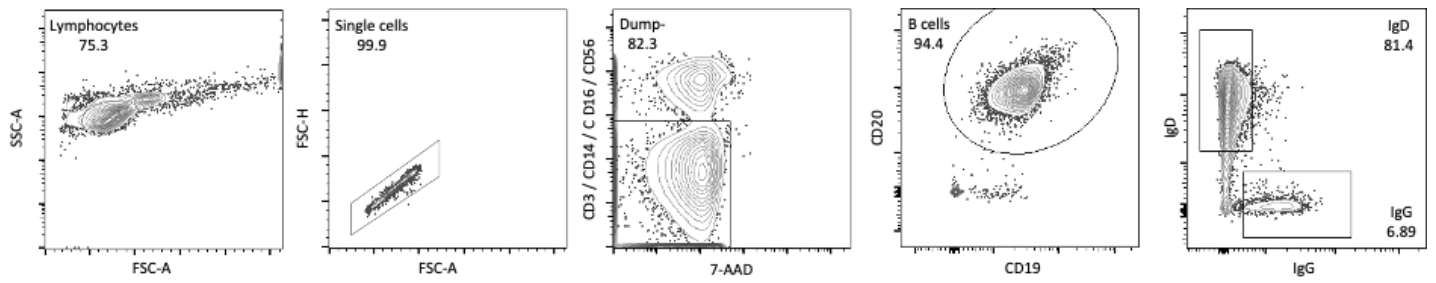

**Supplementary Figure 1. Flow cytometry gating strategy.** Gating scheme followed to identify naïve and memory B cells.

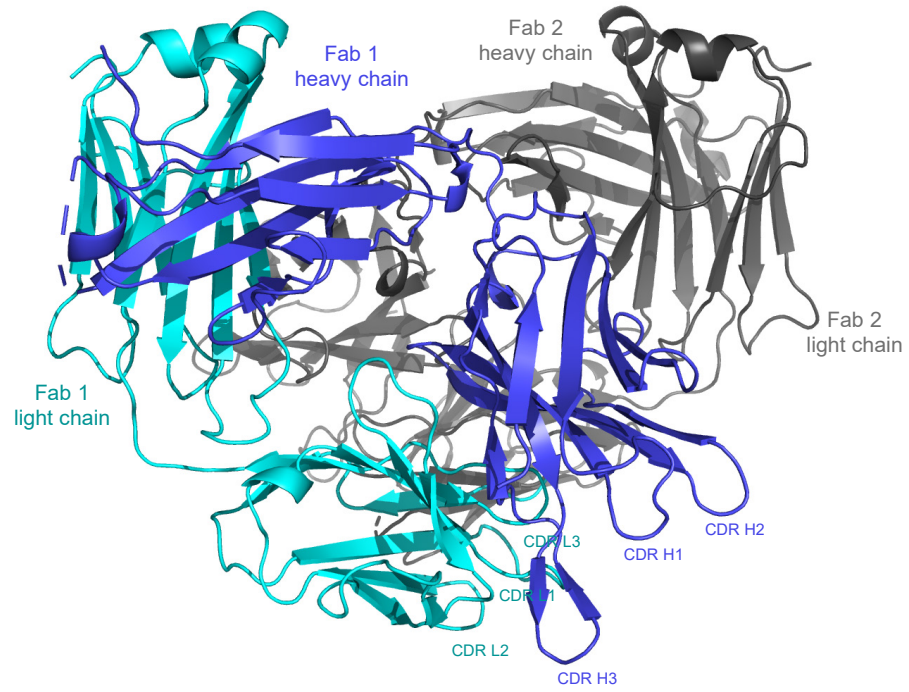

**Supplementary Figure 2.** Asymmetric unit of L5A7.5 Fab solved to 1.8Å. One paired heavy chain (blue) and light chain (cyan) are colored.

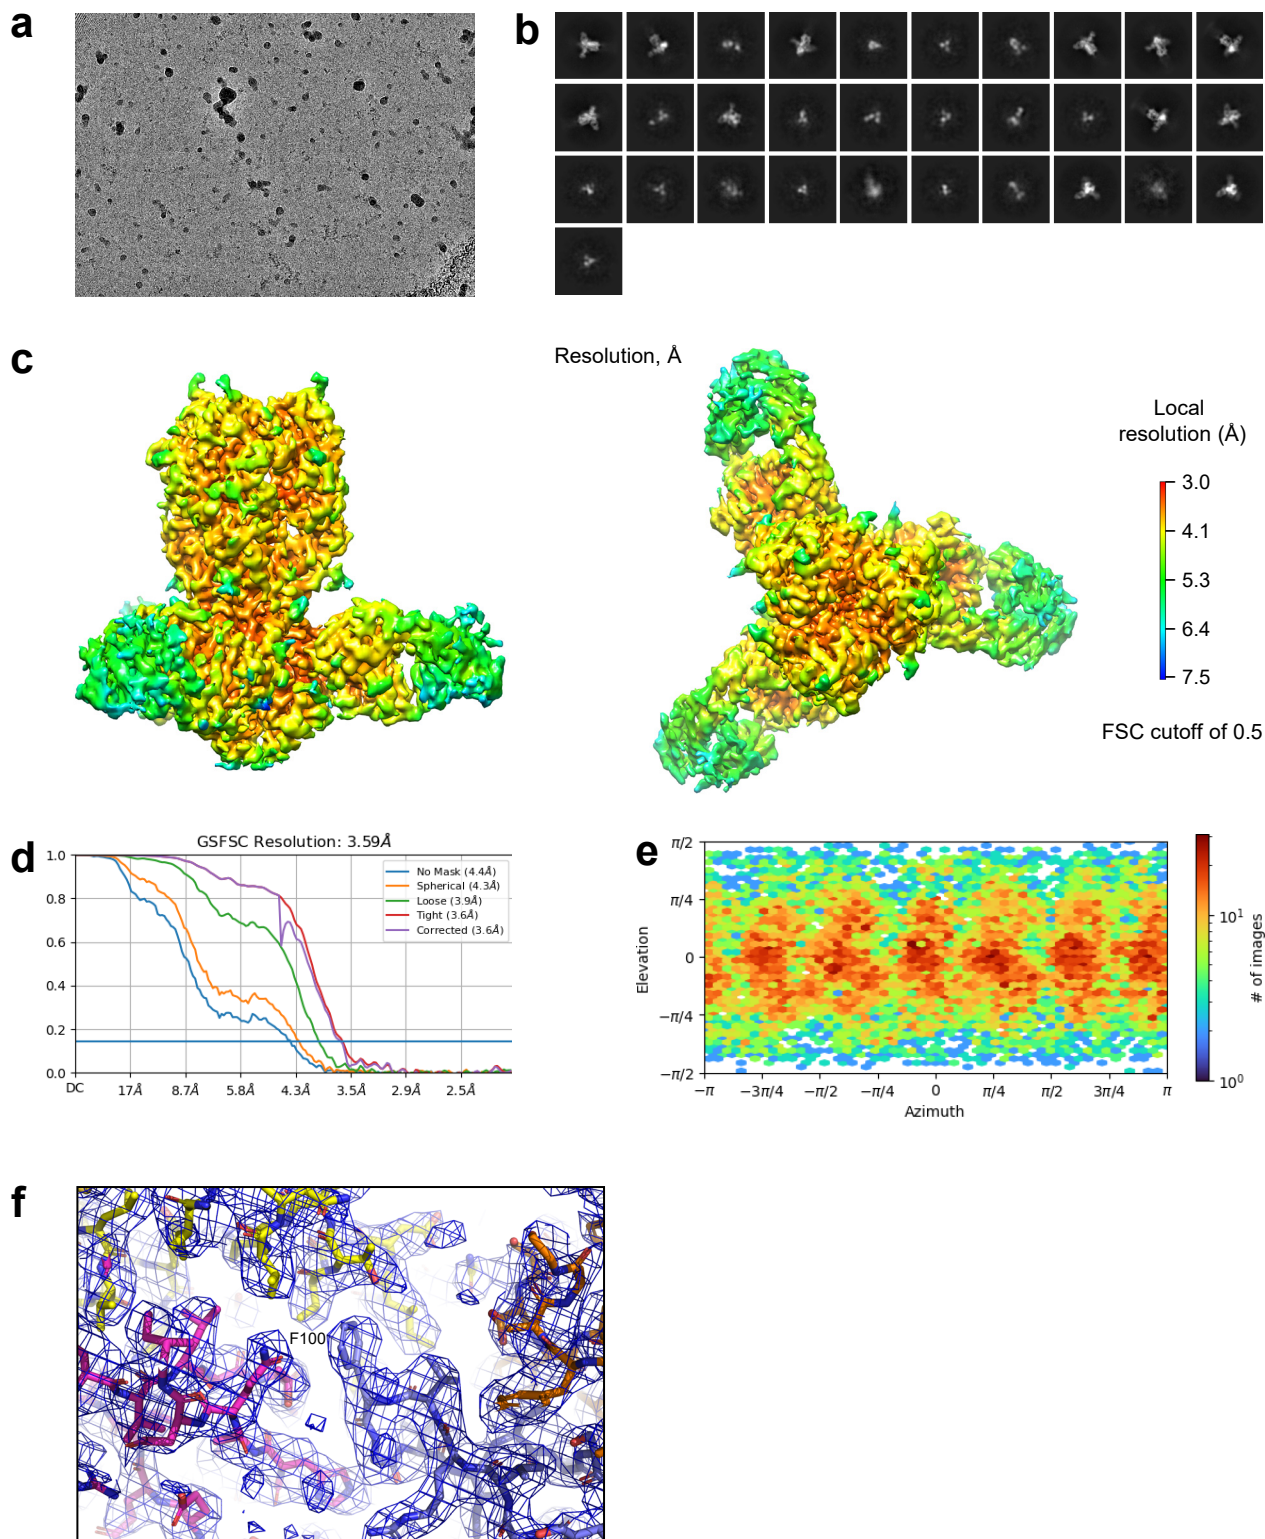

**Supplementary Figure 3. Cryo-EM validation of L5A7.5-INDO05 HA complex.** (a) Representative micrograph. (b) Representative 2D class averages. (c) The local resolution map. (d) The gold-standard Fourier shell correlation after non-uniform refinement. (e) Heatmap showing the orientations of all particles used in the non-uniform refinement. (f) Electron density for selected parts of the protein after focused refinement contorted at  $3.0 \sigma$  in PyMOL.

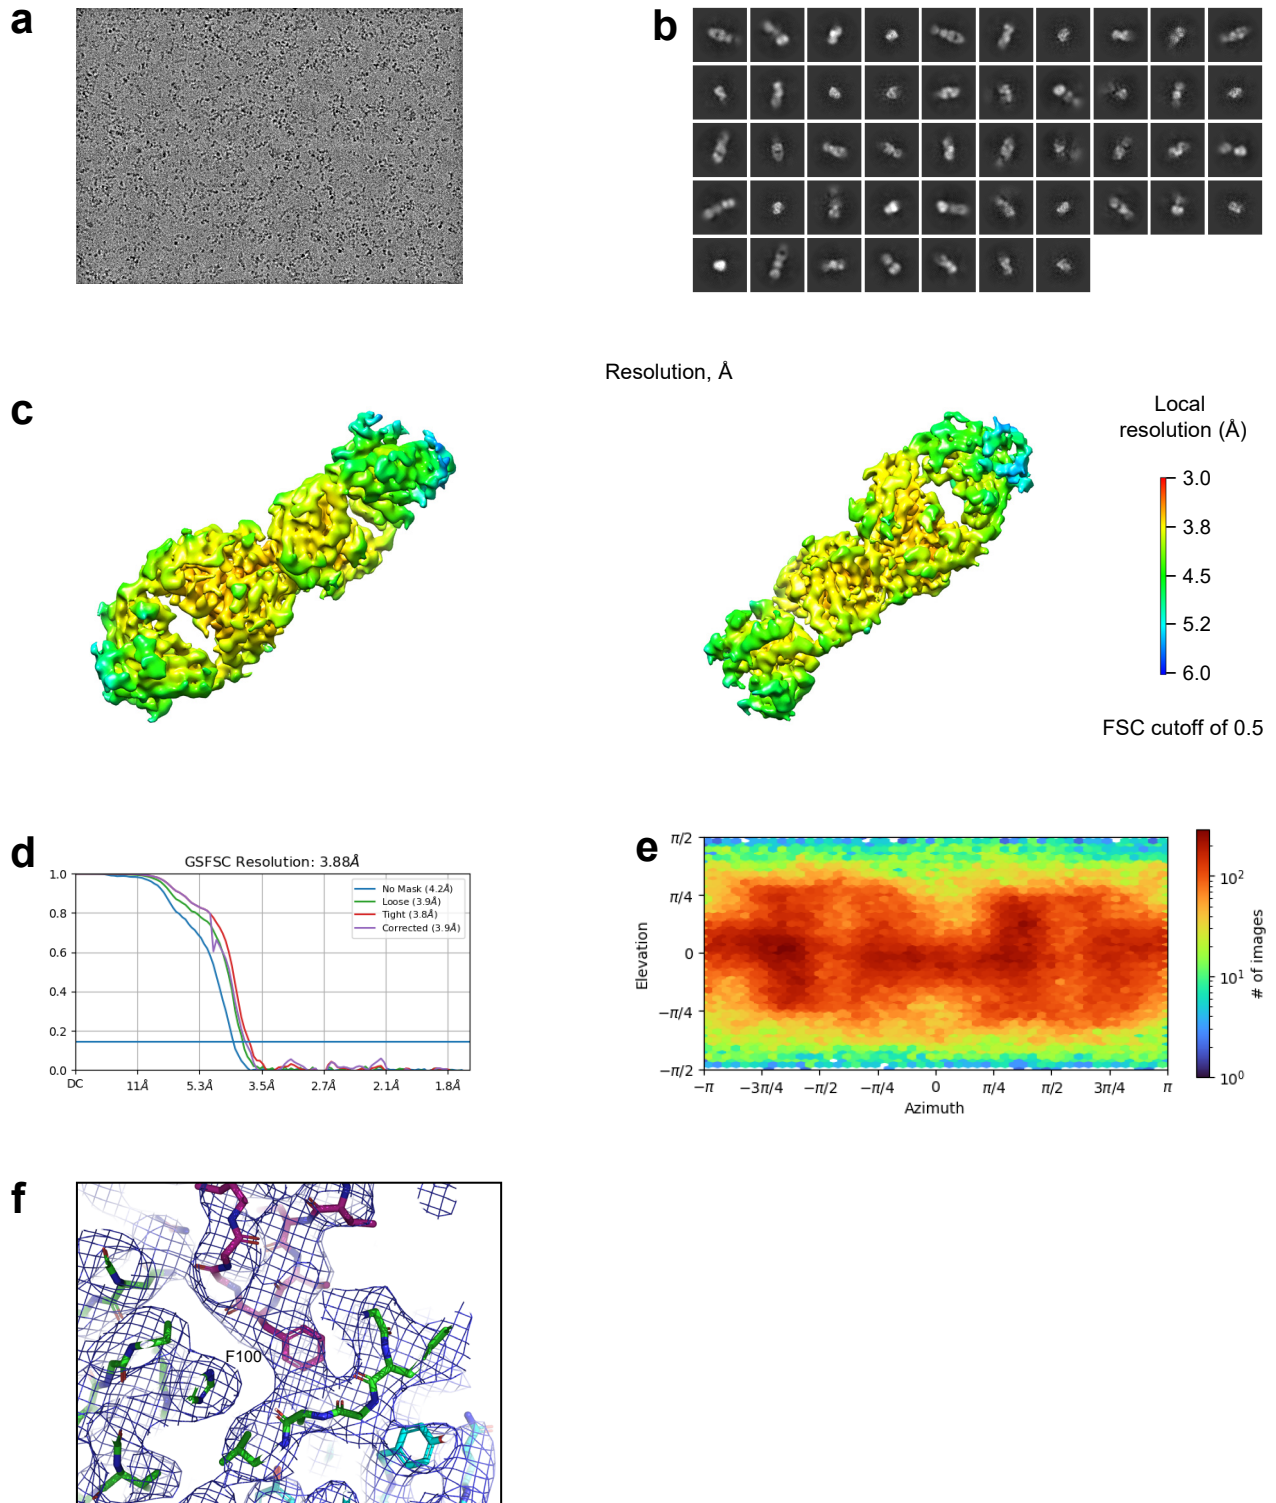

**Supplementary Figure 4. Cryo-EM validation of L5A7.5-28H6E11 complex.** (a) Representative micrograph. (b) Representative 2D class averages. (c) The local resolution map. (d) The gold-standard Fourier shell correlation after non-uniform refinement. (e) Heatmap showing the orientations of all particles used in the non-uniform refinement. (f) Electron density for selected parts of the protein after focused refinement contorted at  $3.0 \sigma$  in PyMOL.



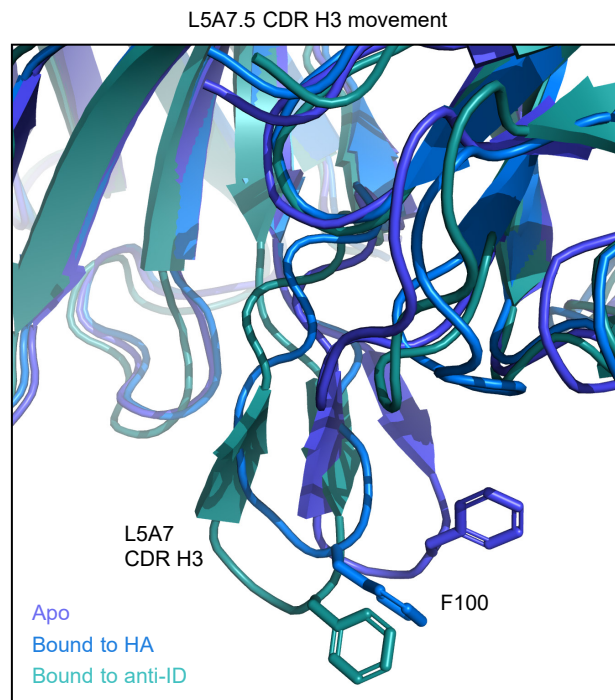

**Supplementary Figure 5. L5A7.5 CDR H3 movement.** View of the CDR H3 region of L5A7.5 from the apo crystal structure and the cryo-EM structures bound to HA and the anti-idiotypic antibody.
